# Supplementary material
Source: Research Square preprint supplement (doi:10.21203/rs.3.rs-10091140/v1)
Supplement: Supplementary file 1 [file 82126a385b915bb364c9848d.pdf]

## Music-Emotion Matching Study: Supplementary Materials

### Supplementary Table S1

*Full Baseline-Adjusted ANCOVA Results for All Affective Outcomes*

| <b>Outcome</b>         | <b><i>b</i></b> | <b><i>SE</i></b> | <b><i>t</i>(144)</b> | <b><i>p</i></b> | <b>Partial <math>\eta^2</math></b> |
|------------------------|-----------------|------------------|----------------------|-----------------|------------------------------------|
| Panicky                | 0.03            | 0.06             | 0.45                 | .656            | .00                                |
| Anxious                | 0.06            | 0.05             | 1.23                 | .220            | .01                                |
| Worried                | -0.01           | 0.04             | -0.20                | .838            | .00                                |
| Nervous                | 0.02            | 0.04             | 0.54                 | .593            | .00                                |
| Annoyed                | -0.00           | 0.04             | -0.06                | .950            | .00                                |
| Bitter                 | 0.04            | 0.04             | 0.98                 | .330            | .00                                |
| Angry                  | -0.03           | 0.02             | -1.45                | .150            | .01                                |
| Bad-tempered           | 0.00            | 0.03             | -0.12                | .908            | .00                                |
| Depressed              | -0.02           | 0.03             | -0.59                | .558            | .01                                |
| Downhearted            | 0.03            | 0.05             | 0.60                 | .552            | .01                                |
| Unhappy                | -0.04           | 0.03             | -1.07                | .285            | .02                                |
| Miserable              | 0.02            | 0.03             | 0.95                 | .344            | .00                                |
| Worn out               | -0.14           | 0.16             | -0.85                | .396            | .01                                |
| Exhausted              | -0.20           | 0.15             | -1.36                | .177            | .01                                |
| Sleepy                 | -0.33           | 0.10             | -3.17                | .002            | .06                                |
| Tired                  | -0.07           | 0.15             | -0.44                | .658            | .00                                |
| Lively                 | 0.35            | 0.16             | 2.22                 | .028            | .03                                |
| Energetic              | 0.33            | 0.16             | 2.08                 | .040            | .03                                |
| Active                 | 0.22            | 0.16             | 1.39                 | .168            | .01                                |
| Alert                  | 0.03            | 0.16             | 0.19                 | .849            | .00                                |
| Confused               | 0.09            | 0.06             | 1.58                 | .116            | .03                                |
| Muddled                | 0.09            | 0.05             | 1.79                 | .075            | .02                                |
| Mixed up               | 0.08            | 0.05             | 1.48                 | .140            | .02                                |
| Uncertain              | 0.00            | 0.05             | -0.04                | .967            | .00                                |
| Tension                | 0.03            | 0.03             | 0.81                 | .422            | .00                                |
| Anger (subscale)       | 0.00            | 0.02             | 0.16                 | .874            | .00                                |
| Depression (subscale)  | 0.01            | 0.03             | 0.31                 | .760            | .00                                |
| Fatigue (subscale)     | -0.18           | 0.11             | -1.76                | .081            | .02                                |
| Confusion (subscale)   | 0.06            | 0.03             | 1.70                 | .092            | .03                                |
| Vigour (subscale)      | 0.24            | 0.13             | 1.86                 | .065            | .01                                |
| Total Mood Disturbance | -0.26           | 0.21             | -1.24                | .216            | .01                                |

*Note.* N = 147. Models regressed post-exercise scores on condition with corresponding pre-exercise score as covariate.

### Supplementary Table S2

*Descriptive Pre–Post Means for Key Psychological Outcomes by Condition*

| <b>Outcome</b> | <b>Group</b>    | <b>n</b> | <b>Pre M (SD)</b> | <b>Post M (SD)</b> |
|----------------|-----------------|----------|-------------------|--------------------|
| Liveliness     | Control         | 74       | 2.84 (1.01)       | 2.92 (1.07)        |
| Liveliness     | Emotion-matched | 73       | 2.71 (1.06)       | 3.22 (1.02)        |

|            |                 |    |              |              |
|------------|-----------------|----|--------------|--------------|
| Energetic  | Control         | 74 | 2.81 (0.87)  | 2.97 (1.05)  |
| Energetic  | Emotion-matched | 73 | 2.78 (0.90)  | 3.29 (1.06)  |
| Vigour     | Control         | 74 | 2.86 (0.77)  | 3.00 (0.98)  |
| Vigour     | Emotion-matched | 73 | 2.76 (0.79)  | 3.17 (0.82)  |
| Sleepiness | Control         | 74 | 1.53 (0.76)  | 1.50 (0.83)  |
| Sleepiness | Emotion-matched | 73 | 1.59 (0.70)  | 1.19 (0.46)  |
| Fatigue    | Control         | 74 | 1.52 (0.57)  | 1.98 (0.74)  |
| Fatigue    | Emotion-matched | 73 | 1.54 (0.61)  | 1.80 (0.62)  |
| RPE        | Control         | 74 | 12.57 (1.69) | 12.89 (1.87) |
| RPE        | Emotion-matched | 73 | 12.53 (1.72) | 13.04 (1.70) |

Note. Descriptive values only. Inferential tests reported in main text.

### Supplementary Table S3

#### *Robustness Checks for Peloton Performance Outcomes*

| Measure         | Specification      | Welch $p$ | Mann–Whitney $p$ | Cohen’s $d$ | Direction Consistent |
|-----------------|--------------------|-----------|------------------|-------------|----------------------|
| Cadence         | Outliers retained  | .491      | .27              | −0.12       | Yes                  |
|                 | Winsorized (1–99%) | .418      | .27              | −0.14       | Yes                  |
| Active calories | Outliers retained  | .458      | .44              | 0.12        | Yes                  |
|                 | Winsorized         | .436      | .44              | 0.13        | Yes                  |
| Distance        | Outliers retained  | .258      | .16              | 0.19        | Yes                  |
|                 | Winsorized         | .258      | .15              | 0.19        | Yes                  |
| Speed           | Outliers retained  | .209      | .16              | 0.21        | Yes                  |
|                 | Winsorized         | .235      | .16              | 0.20        | Yes                  |
| Resistance      | Outliers retained  | .056      | .08              | 0.33        | Yes                  |
|                 | Winsorized         | .059      | .08              | 0.33        | Yes                  |

### Supplementary Table S4

#### *Robustness Checks for Heart-Rate Outcomes*

| Measure    | Specification     | Welch $p$ | Mann–Whitney $p$ | Cohen’s $d$ | Direction Consistent |
|------------|-------------------|-----------|------------------|-------------|----------------------|
| Mean HR    | Outliers retained | .020      | .03              | 0.42        | Yes                  |
|            | Winsorized        | .031      | .03              | 0.39        | Yes                  |
| HRV        | Outliers retained | .033      | .06              | 0.39        | Yes                  |
|            | Winsorized        | .081      | .07              | 0.31        | Yes                  |
| Maximum HR | Outliers retained | .505      | .48              | 0.12        | Yes                  |
|            | Winsorized        | .517      | .49              | 0.11        | Yes                  |

### Supplementary Table S5

*Intercorrelations Among Mechanical Output Variables*

| <b>Measure</b> | <b>Resistance</b> | <b>Speed</b> | <b>Distance</b> | <b>Calories</b> |
|----------------|-------------------|--------------|-----------------|-----------------|
| Resistance     | 1.00              | .88          | .89             | .44             |
| Speed          | .88               | 1.00         | 1.00            | .58             |
| Distance       | .89               | 1.00         | 1.00            | .60             |
| Calories       | .44               | .58          | .60             | 1.00            |

**Supplementary Table S6**

*Composite Total Work Index*

| <b>Measure</b>             | <b>Control <i>n</i></b> | <b><i>M</i> (<i>SD</i>)</b> | <b>Emotion-<br/>matched <i>n</i></b> | <b><i>M</i> (<i>SD</i>)</b> | <b><i>t</i>(126)</b> | <b><i>p</i></b> | <b><i>d</i></b> | <b>95%<br/>CI</b> |
|----------------------------|-------------------------|-----------------------------|--------------------------------------|-----------------------------|----------------------|-----------------|-----------------|-------------------|
| Total<br>work ( <i>z</i> ) | 75                      | -0.10<br>(0.78)             | 67                                   | 0.14<br>(0.98)              | -1.64                | .103            | 0.28            | [-0.61,<br>0.06]  |
